# Supplementary material for: Single-particle cryo-EM structural studies of the β2AR–Gs complex bound with a full agonist formoterol
Source: PubMed Central journal article supplement (PMC7338445; doi:10.1038/s41421-020-0176-9), 2020-07-07
Supplement: 41421_2020_176_MOESM1_ESM.pdf [file 41421_2020_176_MOESM1_ESM.pdf]

**Supplementary Materials for**  
**Single-particle cryo-EM structural studies of  $\beta_2$ AR-Gs complex bound**  
**with full agonist formoterol**

Yanan Zhang<sup>1</sup>, Fan Yang<sup>1</sup>, Shenglong Ling<sup>1</sup>, Pei Lv<sup>1</sup>, Yingxin Zhou<sup>1</sup>, Wei Fang<sup>1</sup>, Wenjing Sun<sup>1</sup>,  
Longhua Zhang<sup>1</sup>, Pan Shi<sup>1</sup>, Changlin Tian<sup>1,2</sup>

<sup>1</sup>Hefei National Laboratory of Physical Sciences at Microscale and School of Life Sciences,  
University of Science and Technology of China, Hefei 230026, China

<sup>2</sup>High Magnetic Field Laboratory, Chinese Academy of Sciences, Hefei, 230030, China

These authors contributed equally: Yanan Zhang, Fan Yang, Shenglong Ling

Correspondence: Shenglong Ling ([lsl@ustc.edu.cn](mailto:lsl@ustc.edu.cn))

Pan Shi ([shipan@ustc.edu.cn](mailto:shipan@ustc.edu.cn)), or Changlin Tian ([cltian@ustc.edu.cn](mailto:cltian@ustc.edu.cn))

## **Materials and Methods**

### **Expression and purification of human $\beta_2$ AR.**

The human  $\beta_2$ AR was truncated<sup>1</sup> at C-terminal from residue 348. N-terminal FLAG tag and C-terminal 10  $\times$  His tag was added for purification. This construct was cloned into pFastBac1 vector and expressed in Sf9 insect cells using the Bac-to-Bac Baculovirus system. The cells at a density of  $2.5 \times 10^6$  cells per ml were infected with baculovirus at 27 °C for 60 h.

Cells were resuspended and grinded sufficiently in low salt buffer (10 mM HEPES, pH 7.5, 10 mM MgCl<sub>2</sub>, 20 mM KCl, protease inhibitors named cocktail (Sigma, S8820)), then ultracentrifuged at 180,000g for 45 min. Precipitate were resuspended and grinded with high salt

buffer (10 mM HEPES, pH7.5, 10 mM MgCl<sub>2</sub>, 20 mM KCl, 1M NaCl, protease inhibitor cocktail). Purified membranes were resuspended in storing buffer (10 mM HEPES, pH7.5, 10 mM MgCl<sub>2</sub>, 20 mM KCl, 30% glycerol, protease inhibitor cocktail). Then, 10 μM formoterol were added, incubating 1 h at 4 °C. Same volume of dissolution buffer (10 mM HEPES, pH 7.5, 1% DDM, 0.2% CHS, 1 M NaCl) were mixed with membrane solution and incubated 2 h at 4 °C. After centrifugating at 180,000 g for 45 min, supernatants were pooled and incubated with preprocessed TALON Metal Affinity Resin (Clontech) overnight at 4 °C. The resin was collected and washed with washing buffer 1 (50 mM HEPES, PH7.5, 0.05% DDM, 0.01% CHS, 500 mM NaCl, 20 mM IMD , 10 μM formoterol, 10 mM MgCl<sub>2</sub>), washing buffer 2 (25 mM HEPES, PH7.5, 0.05% DDM, 0.01% CHS, 500 mM NaCl, 30 mM IMD, 10 μM formoterol), and finally eluted in buffer consisting of 50 mM HEPES, PH 7.5, 0.01% DDM, 0.002% CHS, 150 mM NaCl, 300 mM IMD, 10 μM formoterol. The eluted protein was concentrated and further purified by size-exclusion chromatography on Superdex 200 10/300 GL column (GE Healthcare) in 20 mM HEPES pH 7.5, 150 mM NaCl, 5 mM EDTA, 0.01% (w/v) DDM and 0.002% (w/v) CHS.

### **Expression, purification of G $\alpha$ s, G $\beta$ $\gamma$ and formation of Gs complex.**

The human G $\alpha$ s was cloned into pET28a vector. The construct was expressed in *E.Coli* (BL<sub>21</sub>(Gold)). When bacteria was cultured to a density of OD<sub>600</sub>=0.8 at 37 °C in LB medium containing 100 mg/mL kanamycin, a final concentration of 0.8 mM isopropyl- $\beta$ -Dthiogalactopyranoside (IPTG) was added into medium. Cells were then cultured at 20 °C overnight before harvest. The bovine G $\beta$  and G $\gamma$  were expressed in Sf9 insect cells using

the Bac-to-Bac Baculovirus system. The cells at a density of  $2.5 \times 10^6$  cells per ml were infected with baculovirus at 27 °C for 60 h.

Gas and G $\beta\gamma$  have similar purification steps. Cells were harvested and resuspended with buffer (50 mM HEPES, pH7.5, 200 mM NaCl, 1 mM MgCl and 5.6 mM beta-mercaptoethanol ( $\beta$ -ME) and lysed by high pressure homogenizer. Cell debris were removed by centrifugation at 14000 rpm for 30 min at 4 °C. The over-expressed proteins were purified using Ni-NTA affinity column (QIAGEN) and eluted with buffer (50 mM HEPES, pH7.5, 200 mM NaCl, 250 mM imidazole, 5.6 mM  $\beta$ -ME). Then, the target proteins were concentrated and further purified on Superdex 200 10/300 GL column equilibrated with buffer (50 mM HEPES, pH 7.5, 200 mM NaCl, and 5.6 mM  $\beta$ -ME). To form the Gs complex, Gas and G $\beta\gamma$  were mixed together at molar ratio 1:1 and then incubated at room temperature for 1 h. Gas $\beta\gamma$  complex was isolated on a Superdex 200 10/300 GL column (GE Healthcare) with buffer 20mM HEPES, pH=7.5, 100mM NaCl, 1mM MgCl<sub>2</sub>, 1mM EDTA, 100uM TCEP.

### **Expression and purification of Nb35.**

Nanobody-35 (Nb35)<sup>2</sup> was cloned into pET22b vector and expressed in *E.Coli* (*BL21(Gold)*). Bacteria were grown at 37 °C in LB medium containing 100mg/mL ampicillin to a density of OD<sub>600</sub> = 0.8, a final concentration of 0.8 mM isopropyl- $\beta$ -Dthiogalactopyranoside (IPTG) was added into medium. Cells were then cultured at 20 °C overnight. The bacteria were harvested with buffer consisting of 50 mM HEPES, pH7.5, 200 mM NaCl, 1 mM MgCl and 5.6 mM  $\beta$ -ME, and then lysed by high pressure homogenizer. Cell debris were removed by centrifugation at 14000 rpm for 30 min at 4 °C. The over-expressed proteins were purified using Ni-NTA affinity column and eluted with buffer consisting of 50 mM HEPES, pH7.5, 200 mM NaCl, 250 mM

IMD, 5.6 mM  $\beta$ -ME. The eluted protein was concentrated and further purified by size-exclusion chromatography on Superdex 200 10/300 GL column (GE Healthcare) in 50 mM HEPES, pH7.5, 200 mM NaCl, 5.6 mM  $\beta$ -ME.

### **$\beta_2$ AR-G $\alpha$ s complex preparation**

The purified  $\beta_2$ AR and Gs complex were mixed at a molar ratio 1:1.2 in buffer 1 (20 mM HEPES, pH7.5, 100 mM NaCl, 0.1% DDM, 1 mM EDTA, 3mM MgCl<sub>2</sub>, 10  $\mu$ M formoterol) and incubating at room temperature. To maintain the high-affinity nucleotide-free state of the complex, 25 mU/mL Apyrase was added to hydrolyse GDP from G $\alpha$ s binding pocket. To further maintain the stability of complex, Nb35 was added into the mixture and then incubating for 1 h at room temperature. The formoterol-bound  $\beta_2$ AR-G $\alpha$ s complex was concentrated and further purified by size-exclusion chromatography on Superdex 200 10/300 GL column (GE Healthcare) in buffer consisting of 20 mM HEPES, pH7.5, 100 mM NaCl, 0.02% LMNG, 10  $\mu$ M formoterol.

### **Functional analysis by cAMP assay**

The function data of  $\beta_2$ AR was measured based on intracellular cAMP assay using cAMP-Gs dynamic kit<sup>3</sup> (Cisbio). HEK293T cells were cultured in DMEM medium supplemented with 10% (v/v) fetal bovine serum, 50  $\mu$ g/mL penicillin and 50  $\mu$ g/mL streptomycin using 37 °C incubator supplied with 5% CO<sub>2</sub>. Cells were seeded onto 6-well cell culture plates before transfection. After overnight culture, the cells were transfected with  $\beta_2$ AR-pcDNA3.1 plasmid (or  $\beta_2$ AR mutation plasmid) using Lipofectamine 3000 transfection reagent (Invitrogen). About 12 h after transfection, the cells were collected, and suspended in DMEM containing 500  $\mu$ M 3-isobutyl-1-methylxanthine (IBMX) (Sigma). Then, the cells were seeded onto 384-well plates at a density

of 7500 cells per well. The transfected cells were incubated for 45 min with gradient concentrations of formoterol at incubator. Finally, the cells were incubated with cAMP-D2 and anti-cAMP Crypate for 1 h at room temperature and time-resolved FRET signals were measured at 620 nm and 650 nm using CLARIOstar plate reader (BMG LabTech, Germany). Data were mean  $\pm$  s.e.m. of three independent experiments performed in triplicate.

### **Cryo-EM sample preparation and data collection**

An aliquot of 2.5  $\mu$ L of the sample (0.5 mg/mL) was applied to plasma-treated ( $H_2/O_2$ , 10s) grids (Quantifoil R1.2/1.3 300-mesh Au Holey Carbon). The grids were blotted for 5 s at 100% humidity and 4  $^{\circ}C$ , and then plunged into liquid ethane using a Vitrobot Mark IV (FEI).

Cryo-EM images were recorded on a Gatan K3 Summit direct electron detector in an FEI Titan Krios electron microscope at 300 kV. SerialEM was used for automated data collection<sup>4</sup>. Movies were collected at a nominal magnification of 29000  $\times$  in counting mode, corresponding to a pixel size of 0.53  $\text{\AA}$ . The defocus range was set to -1.5 to -2.5  $\mu$ m. Image stacks were recorded with a total dose of  $\sim 60 e^-/\text{\AA}$ . The electron dose rate is 20  $e^-/\text{\AA}^2/s$ .

### **Image processing**

A total of 2102 micrograph stacks were collected and subjected for motion correction using motioncor2<sup>5</sup>. Contrast transfer function parameters were estimated with Gctf<sup>6</sup>. After manually removal of bad micrographs, a total of 1,781,163 particles were automatically picked from 1733 micrographs. These particles were then subjected to reference-free 2D classification and particles of the best classes were re-extracted for further data processing. A 3D initial model was generated using stochastic gradient descent (SGD) algorithm in Relion-3.0<sup>7</sup>. Next, 776,825

picked particles were performed for global angular searching 3D classification. 218,011 particles from the best-looking class were selected for 3D auto-refinement, which generated an EM map with an overall resolution of 4.06 Å. By post-processing and particle polishing, the final resolution of was improved to 3.8 Å. Map resolution was estimated with the gold-standard Fourier shell correction 0.143 criterion. Local resolution was estimated using Resmap<sup>8</sup>.

### **Model building and refinement**

The initial model for the formoterol-bound  $\beta_2$ AR-Gs complex was derived from BI167107-bound  $\beta_2$ AR-Gs complex (3SN6) followed by extensive remodeling using COOT<sup>9</sup>. The N-terminal residues 1-29, residues 240-264 and C-terminal residues 341-413 of  $\beta_2$ AR were not built due to the lack of corresponding densities. Structure refinements were carried out by PHENIX in real space with secondary structure and geometry restraints to prevent structure overfitting<sup>10,11</sup>. Overfitting of the model was monitored by reeving the model in one or two independent maps from the gold-standard refinement approach and testing the refined model against the other. Validation was performed in MolProbity. Figures were prepared using UCSF Chimera or PyMOL<sup>12</sup>.

### **References**

1. Hanson, M.A. et al. A specific cholesterol binding site is established by the 2.8 Å structure of the human beta2-adrenergic receptor. *Structure* **16**, 897-905 (2008).
2. Rasmussen, S.G. et al. Structure of a nanobody-stabilized active state of the beta(2) adrenoceptor. *Nature* **469**, 175-80 (2011).
3. Norskov-Lauritsen, L., Thomsen, A.R. & Brauner-Osborne, H. G protein-coupled receptor signaling analysis using homogenous time-resolved Forster resonance energy transfer (HTRF(R)) technology. *Int J Mol Sci* **15**, 2554-72 (2014).
4. Mastronarde, D.N. SerialEM: A Program for Automated Tilt Series Acquisition on Tecnai Microscopes Using Prediction of Specimen Position. *Microsc Microanal* **9**, 1182-1183 (2003).
5. Zheng, S.Q. et al. MotionCor2: anisotropic correction of beam-induced motion for improved

- cryo-electron microscopy. *Nature Methods* **14**, 331-332 (2017).
6. Zhang, K. Gctf: Real-time CTF determination and correction. *J Struct Biol* **193**, 1-12 (2016).
  7. Zivanov, J. et al. New tools for automated high-resolution cryo-EM structure determination in RELION-3. *Elife* **7**(2018).
  8. Kucukelbir, A., Sigworth, F.J. & Tagare, H.D. Quantifying the local resolution of cryo-EM density maps. *Nat Methods* **11**, 63-5 (2014).
  9. Emsley, P., Lohkamp, B., Scott, W.G. & Cowtan, K. Features and development of Coot. *Acta Crystallogr D Biol Crystallogr* **66**, 486-501 (2010).
  10. Adams, P.D. et al. PHENIX: a comprehensive Python-based system for macromolecular structure solution. *Acta Crystallogr D Biol Crystallogr* **66**, 213-21 (2010).
  11. Afonine, P.V. et al. New tools for the analysis and validation of cryo-EM maps and atomic models. *Acta Crystallogr D Struct Biol* **74**, 814-840 (2018).
  12. Pettersen, E.F. et al. UCSF Chimera--a visualization system for exploratory research and analysis. *J Comput Chem* **25**, 1605-12 (2004).

## Supplementary Figures

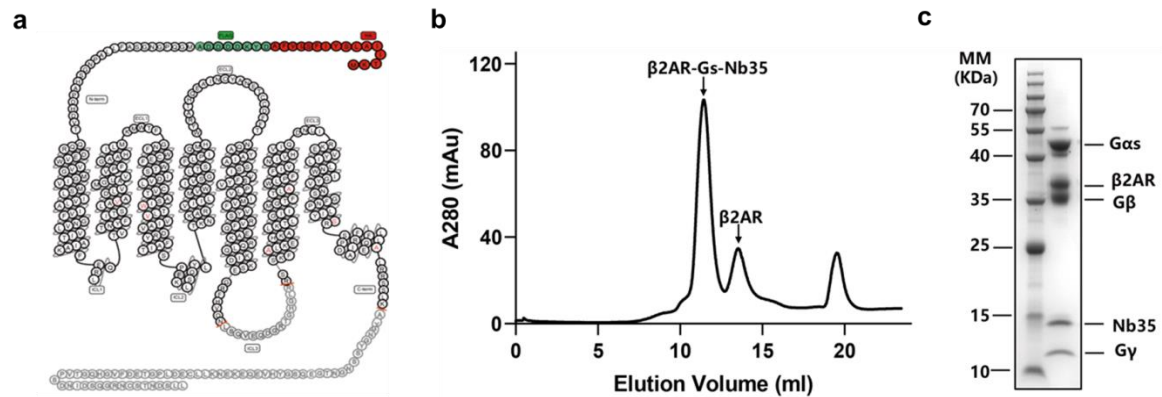

**Supplementary Fig. S1 Preparation of  $\beta_2$ AR-Gs protein complex.** **a** Schematic diagram of the  $\beta_2$ AR construct used in this study. HA signal peptide (red) and Flag epitope (green) were added in N terminus. The amino acids within ICL3 ( $\blacktriangle$ 245- $\blacktriangle$ 259) and C terminus ( $\blacktriangle$ 349- $\blacktriangle$ 413) were truncated to increase protein expression. **b** Size exclusion chromatography profile of formoterol- $\beta_2$ AR-Gs complex. **c** SDS-PAGE analysis of final complex sample, each protein component of formoterol- $\beta_2$ AR-Gs complex was clearly identified.



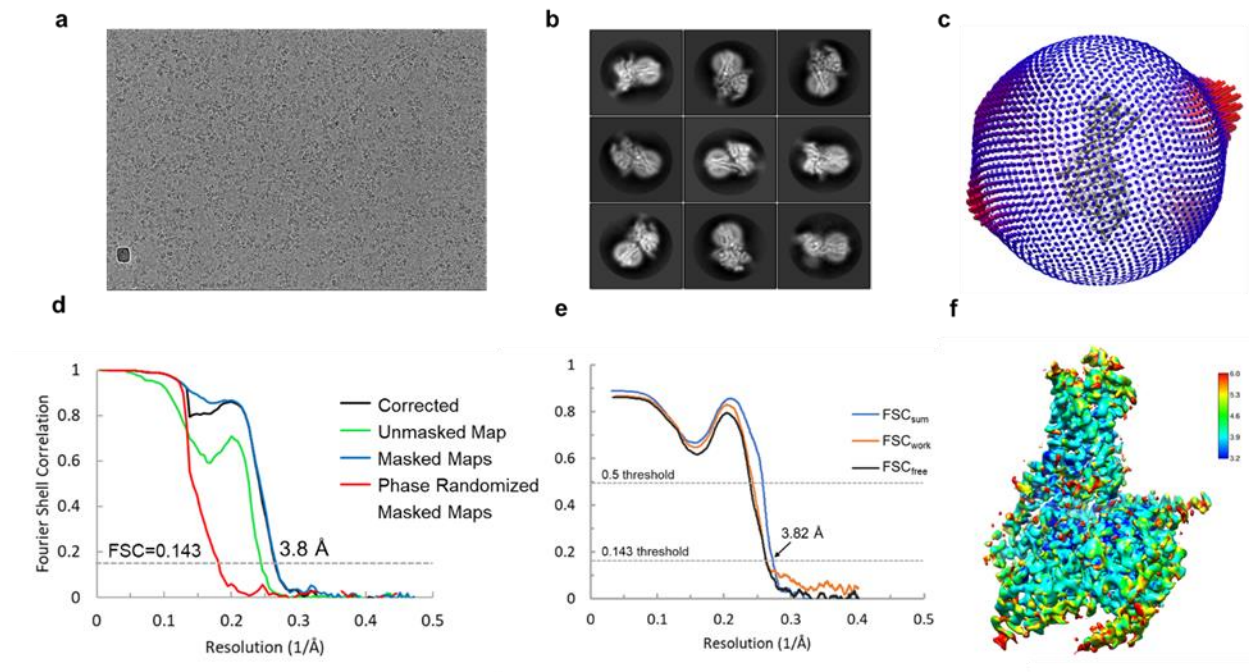

**Supplementary Fig. S2 Cryo-EM analysis of formoterol- $\beta_2$ AR-Gs complex.** **a** Representative cryo-EM image of formoterol- $\beta_2$ AR-Gs complex after motion correction and dose weighting. **b** Representative 2D class averages of formoterol- $\beta_2$ AR-Gs complex. **c** Particle angular distribution of the final cryo-EM reconstruction of  $\beta_2$ AR-Gs-Formoterol complex. **d** The gold-standard fourier shell correlation curves for the maps of formoterol- $\beta_2$ AR-Gs complex. **e** FSCwork/FSCfree validation curves of Formoterol- $\beta_2$ AR-Gs complex. **f** Density map colored by local resolution estimation using Resmap.

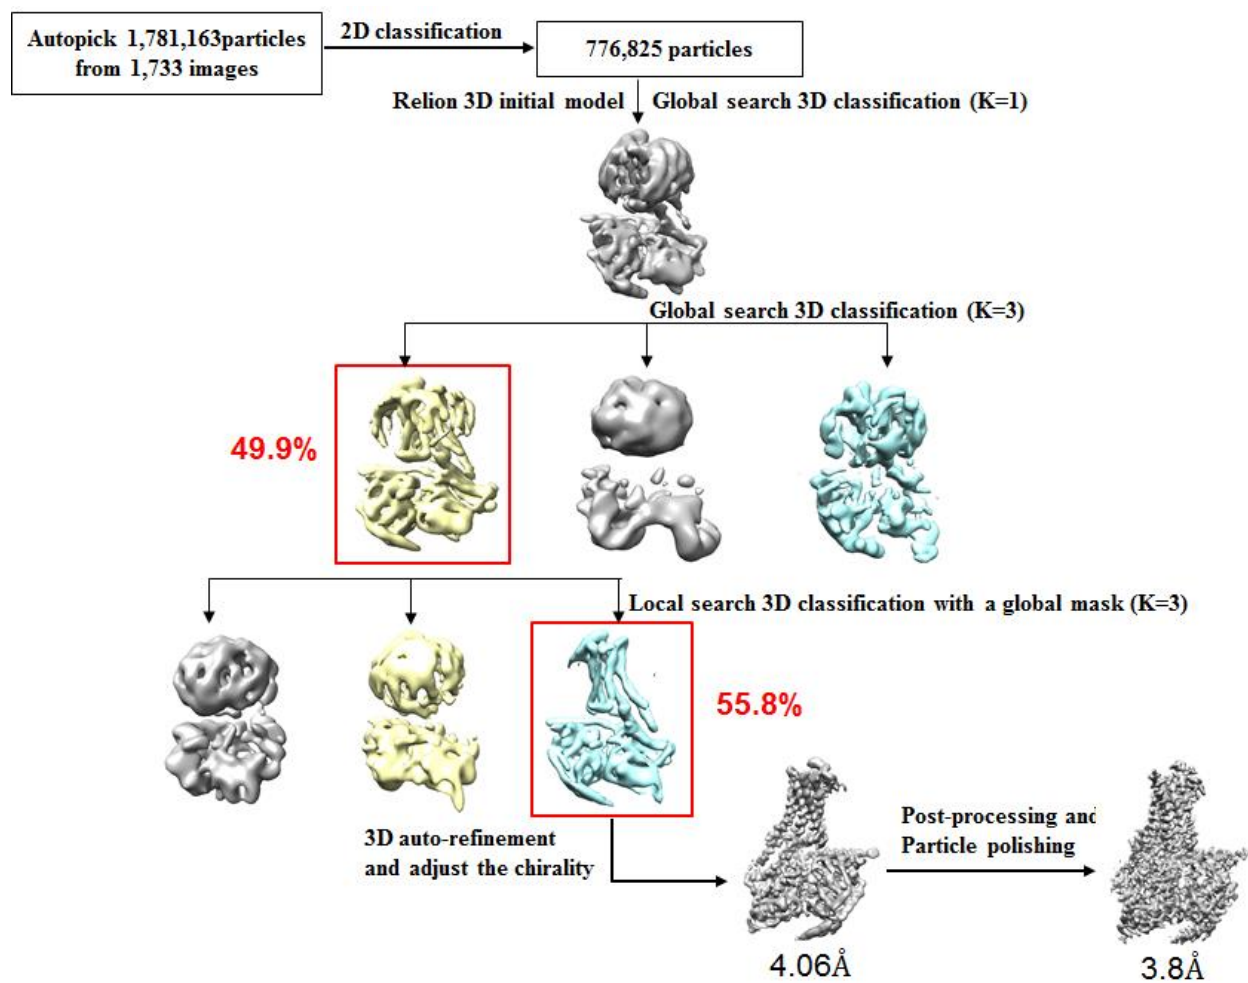

**Supplementary Fig. S3 A flowchart of cryo-EM data processing and structure determination of the formoterol-β<sub>2</sub>AR-Gs complex .**

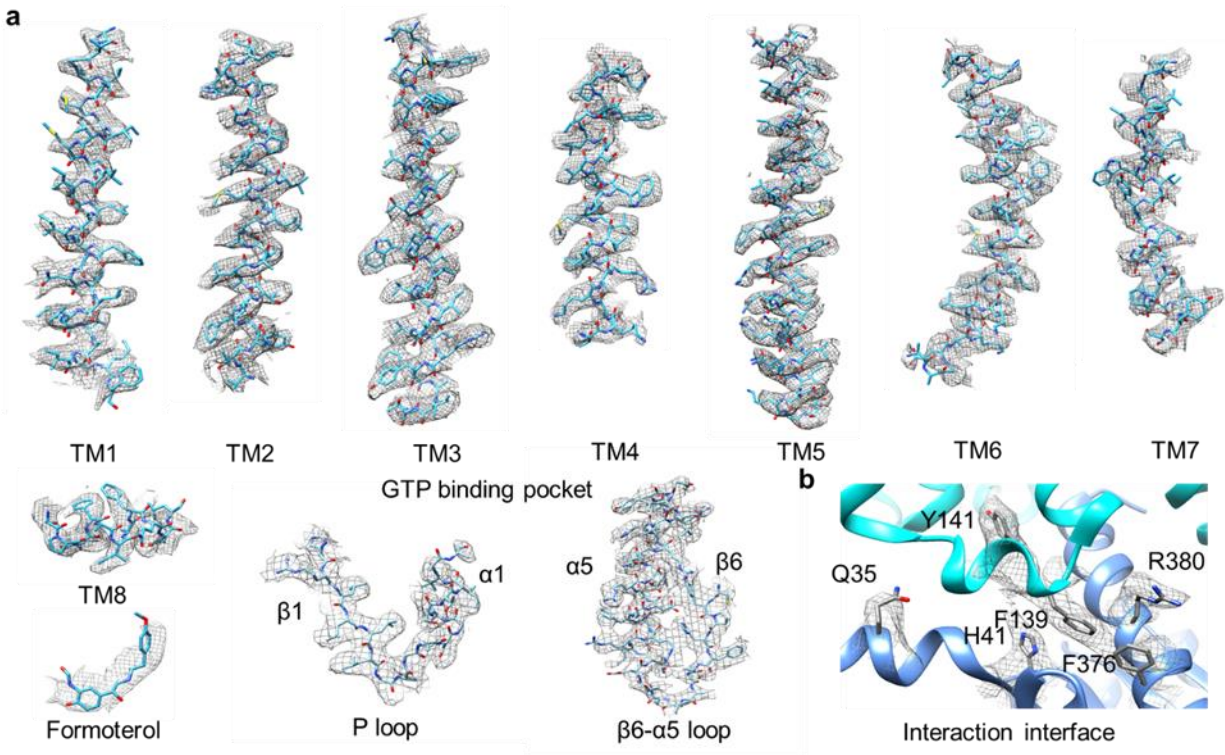

**Supplementary Fig. S4 Cryo-EM densities of representative segments of human**

**formoterol- $\beta$ <sub>2</sub>AR-Gs complex. a** EM densities of representative segments of

formoterol- $\beta$ <sub>2</sub>AR-Gs complex. **b** The side chain densities of residues engaged in receptor-Gs interaction interface.

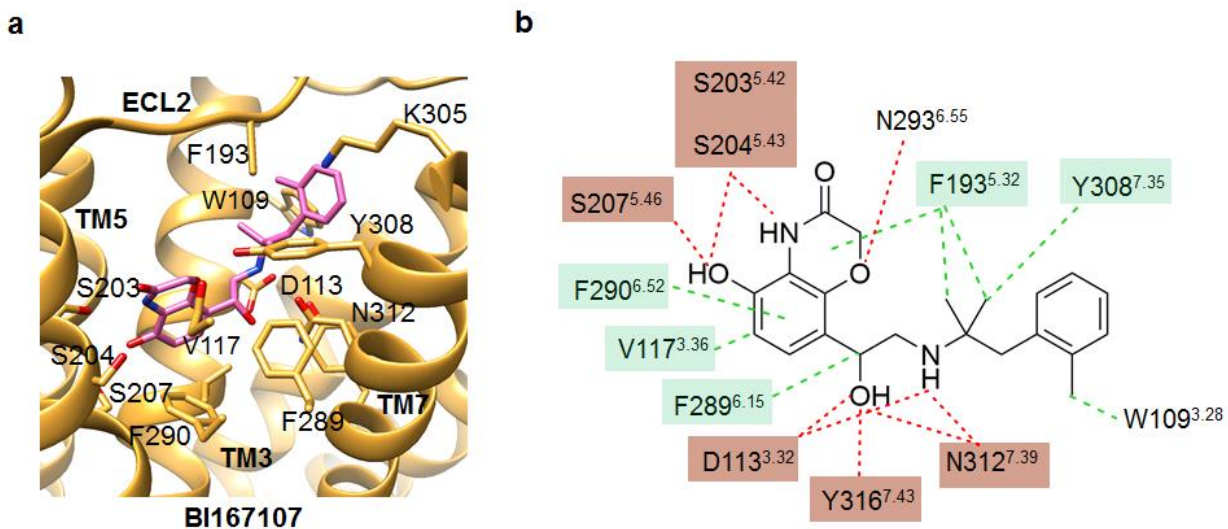

**Supplementary Fig. S5 Schematic representation of the interactions between the  $\beta_2$ AR and the ligands BI167107. **a** Side views of ligand binding pockets in the BI167107-bound  $\beta_2$ AR structure. Residues within 4 Å of ligand is shown as sticks. **b** The residues shown here have at least one atom with 4 Å of the ligand in the crystal structure. Green lines indicate potential hydrophobic interactions and red lines indicate potential polar interactions.**

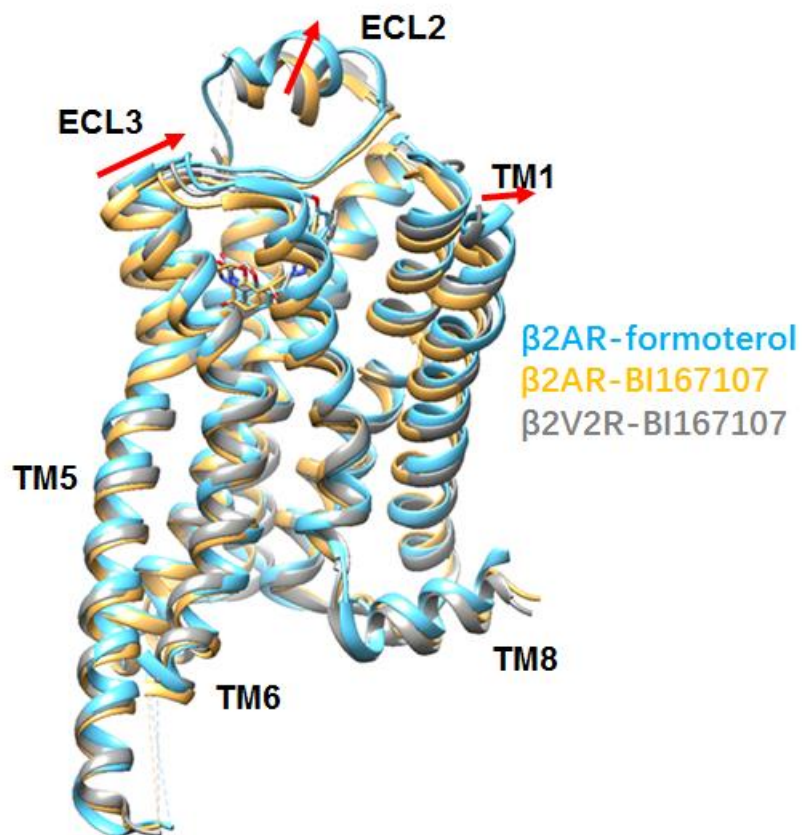

**Supplementary Fig. S6** The structure comparison of the formoterol bound  $\beta_2$ AR, BI167107 bound  $\beta_2$ AR and  $\beta_2$ V2R. The structures of BI167107-bound  $\beta_2$ AR was solved by crystallography while the formoterol-bound  $\beta_2$ AR and BI167107-bound  $\beta_2$ V2R were solved by cryo-EM.

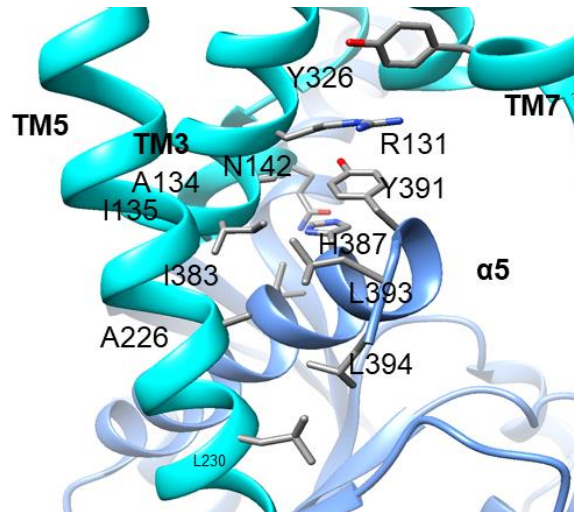

**Supplementary Fig.S7 The  $\beta_2$ AR-G $\alpha_s$  interface in formoterol- $\beta_2$ AR-Gs complex.**

The  $\alpha_5$ -helix of G $\alpha_s$  docks into a cavity formed by the intracellular part of transmembrane helix 5 and helix 6.

**Supplementary Table S1.**

Statistics of cryo-EM data collection, 3D reconstruction and model refinement.

**Data collection and processing**

|                                             |                                     |
|---------------------------------------------|-------------------------------------|
| Protein                                     | formoterol- $\beta_2$ AR-Gs complex |
| Microscope                                  | FEI Titan Krios                     |
| Voltage (kV)                                | 300                                 |
| Detector                                    | Gatan K3 Summit                     |
| Detector mode                               | Counting                            |
| Pixel size (Å)                              | 0.53                                |
| Defocus range ( $\mu\text{m}$ )             | -1.5~-2.5                           |
| Electron dose ( $\text{e}^- / \text{Å}^2$ ) | 58.7                                |
| Magnification                               | 29000                               |
| Number of images                            | 1625                                |
| Symmetry imposed                            | C1                                  |
| Initial particle images(no.)                | 1,781,163                           |
| Final particle images (no.)                 | 219,254                             |
| Map resolution (Å)                          | 3.82                                |
| FSC threshold                               | 0.143                               |
| Map resolution range(Å)                     | 1.06-999                            |

**Model refinement**

|                      |       |
|----------------------|-------|
| Model resolution (Å) | 3.82  |
| FSC threshold        | 0.143 |
| Model composition    |       |
| Chains               | 6     |
| Non-hydrogen atoms   | 7,393 |
| Protein residues     | 978   |
| Ligands              | H98   |
| R.m.s. deviations    |       |
| Bond length (Å)      | 0.004 |



|                       |       |
|-----------------------|-------|
| Bond angles (°)       | 0.649 |
| Validation            |       |
| MolProbity score      | 2.16  |
| Clashscore            | 12.28 |
| Ramachandran plot (%) |       |
| Outliers              | 0.00  |
| Allowed               | 10.21 |
| Favored               | 89.79 |

---
